# Supplementary material
Source: HighWire-hosted journal article supplement (doi:10.1101/rna.047647.114)
Supplement: SuppTable1_Legend.docx [file SuppTable1_Legend.docx]

**Supplementary Table 1**

Sequences of primers used in RACE, RT-PCR and qPCR experiments. Also listed are accession numbers for the clone sequences in dbEST from initial RACE and RT-PCR reactions, antibodies and dilution at which they were used, and peptide sequences targeted in mass spectroscopy analysis.
